# Supplementary material for: Health Care and Productivity Costs Associated With Diabetic Patients With Macrovascular Comorbid Conditions
Source: PubMed Central journal article supplement — Diabetes Care. 2009 Sep 3;32(12):2187–92. doi: 10.2337/dc09-1128 (PMC2782975; doi:10.2337/dc09-1128), 2009-09-03
Supplement: supp_dc09-1128_1128_Online_Appendix.pdf [file supp_dc09-1128_1128_Online_Appendix.pdf]

Appendix 1. Generalized linear model on healthcare expense for diabetes patients (n=4,233)

| Variable                     | Coefficient | 95% Confidence Interval |       | P-value |
|------------------------------|-------------|-------------------------|-------|---------|
| MVCC                         | 0.42***     | 0.30                    | 0.54  | <0.001  |
| Without MVCC (reference)     | 0           |                         |       |         |
| Age groups (years)           |             |                         |       |         |
| 18-24 (reference)            | 0           |                         |       |         |
| 25-34                        | 0.28        | -0.19                   | 0.74  | 0.24    |
| 35-44                        | 0.24        | -0.14                   | 0.62  | 0.21    |
| 45-54                        | 0.29        | -0.07                   | 0.65  | 0.12    |
| 55-64                        | 0.42*       | 0.06                    | 0.78  | 0.024   |
| 65+                          | 0.47*       | 0.09                    | 0.86  | 0.016   |
| Gender                       |             |                         |       |         |
| Female                       | -0.05       | -0.15                   | 0.06  | 0.37    |
| Race                         |             |                         |       |         |
| White (reference)            | 0           |                         |       |         |
| Black                        | -0.07       | -0.20                   | 0.06  | 0.28    |
| Asian                        | -0.43*      | -0.77                   | -0.08 | 0.015   |
| Other race                   | -0.16       | -0.38                   | 0.06  | 0.16    |
| Hispanic ethnicity           | -0.24**     | -0.38                   | -0.10 | 0.001   |
| Years of Education           |             |                         |       |         |
| 0 (reference)                | 0           |                         |       |         |
| 1-8                          | 0.28*       | 0.02                    | 0.55  | 0.037   |
| 9-11                         | 0.41**      | 0.13                    | 0.69  | 0.004   |
| 12                           | 0.43**      | 0.16                    | 0.70  | 0.002   |
| 13-16                        | 0.34*       | 0.06                    | 0.61  | 0.017   |
| >16                          | 0.49**      | 0.18                    | 0.79  | 0.002   |
| Income level                 |             |                         |       |         |
| Negative or poor (reference) | 0           |                         |       |         |
| Near poor                    | 0.02        | -0.20                   | 0.24  | 0.88    |
| Low income                   | -0.17*      | -0.34                   | -0.01 | 0.041   |
| Middle income                | -0.10       | -0.28                   | 0.08  | 0.29    |
| High income                  | -0.02       | -0.21                   | 0.16  | 0.80    |
| Unemployed                   | 0.02        | -0.11                   | 0.15  | 0.77    |
| Health insurance             |             |                         |       |         |
| Medicare                     | 0.37***     | 0.20                    | 0.53  | <0.001  |
| Medicaid                     | 0.44***     | 0.28                    | 0.60  | <0.001  |
| Private HMO                  | 0.34***     | 0.19                    | 0.48  | <0.001  |
| Other private plan           | 0.22**      | 0.08                    | 0.35  | 0.002   |
| Currently smoke              | -0.02       | -0.15                   | 0.11  | 0.78    |
| Number of CS categories      | 0.30***     | 0.25                    | 0.34  | <0.001  |
| Nephropathy                  | 0.33***     | 0.18                    | 0.48  | <0.001  |
| Retinopathy                  | 0.24***     | 0.11                    | 0.38  | <0.001  |
| Neuropathy                   | 0.61*       | 0.06                    | 1.16  | 0.029   |

Note: positive coefficient indicates higher cost and negative coefficient indicates lower cost.

\* p<0.05; \*\* p<0.01; \*\*\* p<0.001

Appendix 2. Negative binomial model on missed work days for diabetes patients (n=4,233)

| Variable                     | IRR     | 95% Confidence Interval |      | P-value |
|------------------------------|---------|-------------------------|------|---------|
| MVCC                         | 3.24*** | 2.20                    | 4.77 | <0.001  |
| Without MVCC (reference)     | 1       |                         |      |         |
| Age groups (years)           |         |                         |      |         |
| 18-24 (reference)            | 1       |                         |      |         |
| 25-34                        | 2.34*   | 1.03                    | 5.35 | 0.043   |
| 35-44                        | 1.84    | 0.86                    | 3.95 | 0.12    |
| 45-54                        | 1.70    | 0.78                    | 3.68 | 0.18    |
| 55-64                        | 2.07    | 0.97                    | 4.45 | 0.061   |
| 65+                          | 2.04    | 0.80                    | 5.19 | 0.14    |
| Gender                       |         |                         |      |         |
| Female                       | 1.00    | 0.75                    | 1.33 | 0.98    |
| Race                         |         |                         |      |         |
| White (reference)            | 1       |                         |      |         |
| Black                        | 0.83    | 0.60                    | 1.14 | 0.25    |
| Asian                        | 0.64    | 0.30                    | 1.37 | 0.25    |
| Other race                   | 1.20    | 0.69                    | 2.10 | 0.52    |
| Hispanic ethnicity           | 0.57*   | 0.36                    | 0.89 | 0.013   |
| Years of Education           |         |                         |      |         |
| 0 (reference)                | 1       |                         |      |         |
| 1-8                          | 3.37*   | 1.30                    | 8.74 | 0.012   |
| 9-11                         | 3.08*   | 1.20                    | 7.95 | 0.02    |
| 12                           | 2.12    | 0.86                    | 5.26 | 0.10    |
| 13-16                        | 1.54    | 0.62                    | 3.83 | 0.35    |
| >16                          | 1.89    | 0.49                    | 7.24 | 0.35    |
| Income level                 |         |                         |      |         |
| Negative or poor (reference) | 1       |                         |      |         |
| Near poor                    | 0.82    | 0.43                    | 1.57 | 0.55    |
| Low income                   | 0.87    | 0.49                    | 1.56 | 0.65    |
| Middle income                | 0.50**  | 0.30                    | 0.84 | 0.009   |
| High income                  | 0.38**  | 0.22                    | 0.67 | 0.001   |
| Unemployed                   | 0.09*** | 0.05                    | 0.15 | <0.001  |
| Health insurance             |         |                         |      |         |
| Medicare                     | 0.70    | 0.35                    | 1.40 | 0.31    |
| Medicaid                     | 1.03    | 0.61                    | 1.72 | 0.91    |
| Private HMO                  | 1.92**  | 1.26                    | 2.91 | 0.002   |
| Other private plan           | 1.24    | 0.87                    | 1.77 | 0.23    |
| Currently smoke              | 0.80    | 0.58                    | 1.10 | 0.17    |
| Number of CS categories      | 1.44*** | 1.24                    | 1.67 | <0.001  |
| Nephropathy                  | 1.65*   | 1.04                    | 2.64 | 0.034   |
| Retinopathy                  | 0.87    | 0.63                    | 1.22 | 0.42    |
| Neuropathy                   | 12.8*** | 2.54                    | 64.8 | <0.001  |

Note: IRR: incidence-rate ratio, for which larger than 1 indicates higher number of days.

\* p<0.05; \*\* p<0.01; \*\*\* p<0.001

Appendix 3. Negative binomial model on additional bed days for diabetes patients (n=4,233)

| Variable                     | IRR     | 95% Confidence Interval |       | P-value |
|------------------------------|---------|-------------------------|-------|---------|
| MVCC                         | 1.41*   | 1.04                    | 1.89  | 0.025   |
| Without MVCC (reference)     | 1       |                         |       |         |
| Age groups (years)           |         |                         |       |         |
| 18-24 (reference)            | 1       |                         |       |         |
| 25-34                        | 0.44    | 0.13                    | 1.49  | 0.19    |
| 35-44                        | 0.36    | 0.12                    | 1.09  | 0.072   |
| 45-54                        | 0.43    | 0.14                    | 1.30  | 0.13    |
| 55-64                        | 0.33*   | 0.11                    | 0.97  | 0.044   |
| 65+                          | 0.30*   | 0.10                    | 0.95  | 0.04    |
| Gender                       |         |                         |       |         |
| Female                       | 0.91    | 0.71                    | 1.18  | 0.50    |
| Race                         |         |                         |       |         |
| White (reference)            | 1       |                         |       |         |
| Black                        | 1.33    | 0.86                    | 2.06  | 0.19    |
| Asian                        | 0.52    | 0.27                    | 1.00  | 0.051   |
| Other race                   | 1.20    | 0.71                    | 2.04  | 0.50    |
| Hispanic ethnicity           | 0.59**  | 0.42                    | 0.83  | 0.003   |
| Years of Education           |         |                         |       |         |
| 0 (reference)                | 1       |                         |       |         |
| 1-8                          | 1.16    | 0.51                    | 2.66  | 0.73    |
| 9-11                         | 2.22    | 0.91                    | 5.40  | 0.079   |
| 12                           | 1.39    | 0.60                    | 3.23  | 0.44    |
| 13-16                        | 1.41    | 0.60                    | 3.29  | 0.43    |
| >16                          | 1.23    | 0.46                    | 3.30  | 0.68    |
| Income level                 |         |                         |       |         |
| Negative or poor (reference) | 1       |                         |       |         |
| Near poor                    | 1.25    | 0.77                    | 2.03  | 0.36    |
| Low income                   | 1.01    | 0.68                    | 1.51  | 0.96    |
| Middle income                | 0.80    | 0.54                    | 1.19  | 0.28    |
| High income                  | 0.52**  | 0.34                    | 0.78  | 0.002   |
| Unemployed                   | 2.93*** | 2.19                    | 3.93  | <0.001  |
| Health insurance             |         |                         |       |         |
| Medicare                     | 1.67**  | 1.18                    | 2.37  | 0.004   |
| Medicaid                     | 1.44*   | 1.05                    | 1.97  | 0.023   |
| Private HMO                  | 0.87    | 0.58                    | 1.29  | 0.49    |
| Other private plan           | 0.51*** | 0.36                    | 0.72  | <0.001  |
| Currently smoke              | 1.23    | 0.92                    | 1.65  | 0.16    |
| Number of CS categories      | 1.54*** | 1.38                    | 1.72  | <0.001  |
| Nephropathy                  | 1.43*   | 1.00                    | 2.05  | 0.049   |
| Retinopathy                  | 1.25    | 0.92                    | 1.68  | 0.15    |
| Neuropathy                   | 9.98**  | 2.06                    | 48.36 | 0.004   |

Note: IRR: incidence-rate ratio, for which larger than 1 indicates higher number of days.

\* p<0.05; \*\* p<0.01; \*\*\* p<0.001

Appendix 4. Generalized linear model on healthcare expense for all patients (n=46,617)

| Variable                        | Coefficient | 95% Confidence Interval |       | P-value |
|---------------------------------|-------------|-------------------------|-------|---------|
| Diabetes                        | 0.45***     | 0.36                    | 0.54  | <0.001  |
| MVCC                            | 0.78***     | 0.65                    | 0.90  | <0.001  |
| Diabetes × MVCC                 | -0.50***    | -0.69                   | -0.31 | <0.001  |
| No diabetes or MVCC (reference) | 0           |                         |       |         |
| Age groups (years)              |             |                         |       |         |
| 18-24 (reference)               | 0           |                         |       |         |
| 25-34                           | 0.24***     | 0.14                    | 0.34  | <0.001  |
| 35-44                           | 0.20***     | 0.10                    | 0.30  | <0.001  |
| 45-54                           | 0.44***     | 0.34                    | 0.55  | <0.001  |
| 55-64                           | 0.62***     | 0.50                    | 0.75  | <0.001  |
| 65+                             | 0.32*       | 0.07                    | 0.58  | 0.013   |
| Gender                          |             |                         |       |         |
| Female                          | 0.31***     | 0.26                    | 0.36  | <0.001  |
| Race                            |             |                         |       |         |
| White (reference)               | 0           |                         |       |         |
| Black                           | -0.21***    | -0.29                   | -0.13 | <0.001  |
| Asian                           | -0.37***    | -0.53                   | -0.22 | <0.001  |
| Other race                      | 0.01        | -0.21                   | 0.24  | 0.91    |
| Hispanic ethnicity              | -0.42***    | -0.51                   | -0.33 | <0.001  |
| Years of Education              |             |                         |       |         |
| 0 (reference)                   | 0           |                         |       |         |
| 1-8                             | 0.31        | -0.12                   | 0.73  | 0.16    |
| 9-11                            | 0.28        | -0.10                   | 0.66  | 0.15    |
| 12                              | 0.37        | -0.01                   | 0.75  | 0.055   |
| 13-16                           | 0.45*       | 0.07                    | 0.83  | 0.021   |
| >16                             | 0.54**      | 0.15                    | 0.94  | 0.006   |
| Income level                    |             |                         |       |         |
| Negative or poor (reference)    | 0           |                         |       |         |
| Near poor                       | 0.02        | -0.13                   | 0.17  | 0.78    |
| Low income                      | -0.05       | -0.17                   | 0.06  | 0.39    |
| Middle income                   | 0.00        | -0.11                   | 0.12  | 0.96    |
| High income                     | 0.13*       | 0.00                    | 0.25  | 0.045   |
| Unemployed                      | 0.15***     | 0.07                    | 0.22  | <0.001  |
| Health insurance                |             |                         |       |         |
| Medicare                        | 0.59***     | 0.35                    | 0.83  | <0.001  |
| Medicaid                        | 0.74***     | 0.64                    | 0.85  | <0.001  |
| Private HMO                     | 0.54***     | 0.45                    | 0.63  | <0.001  |
| Other private plan              | 0.50***     | 0.42                    | 0.58  | <0.001  |
| Currently smoke                 | -0.07       | -0.14                   | 0.00  | 0.061   |
| Number of CS categories         | 0.63***     | 0.61                    | 0.66  | <0.001  |
| Nephropathy                     | 0.10        | -0.07                   | 0.26  | 0.25    |
| Retinopathy                     | 0.21**      | 0.06                    | 0.35  | 0.005   |
| Neuropathy                      | 0.57        | -0.48                   | 1.61  | 0.29    |

Note: positive coefficient indicates higher cost and negative coefficient indicates lower cost.

\* p<0.05; \*\* p<0.01; \*\*\* p<0.001

Appendix 5. Negative binomial model on missed work days for all patients (n=46,617)

| Variable                        | IRR     | 95% Confidence Interval |      | P-value |
|---------------------------------|---------|-------------------------|------|---------|
| Diabetes                        | 1.19*   | 1.03                    | 1.38 | 0.041   |
| MVCC                            | 1.78*** | 1.36                    | 2.33 | <0.001  |
| Diabetes × MVCC                 | 1.47    | 0.87                    | 2.50 | 0.15    |
| No diabetes or MVCC (reference) | 1       |                         |      |         |
| Age groups (years)              |         |                         |      |         |
| 18-24 (reference)               | 1       |                         |      |         |
| 25-34                           | 1.57*** | 1.36                    | 1.81 | <0.001  |
| 35-44                           | 1.55*** | 1.32                    | 1.82 | <0.001  |
| 45-54                           | 1.53*** | 1.29                    | 1.81 | <0.001  |
| 55-64                           | 1.31*   | 1.06                    | 1.62 | 0.014   |
| 65+                             | 0.72    | 0.38                    | 1.36 | 0.30    |
| Gender                          |         |                         |      |         |
| Female                          | 1.28*** | 1.15                    | 1.42 | <0.001  |
| Race                            |         |                         |      |         |
| White (reference)               | 1       |                         |      |         |
| Black                           | 1.05    | 0.91                    | 1.22 | 0.51    |
| Asian                           | 0.79    | 0.63                    | 1.01 | 0.056   |
| Other race                      | 1.46**  | 1.13                    | 1.87 | 0.003   |
| Hispanic ethnicity              | 0.84*   | 0.73                    | 0.98 | 0.028   |
| Years of Education              |         |                         |      |         |
| 0 (reference)                   | 1       |                         |      |         |
| 1-8                             | 1.11    | 0.51                    | 2.42 | 0.80    |
| 9-11                            | 0.98    | 0.50                    | 1.93 | 0.96    |
| 12                              | 1.01    | 0.50                    | 2.02 | 0.99    |
| 13-16                           | 0.84    | 0.41                    | 1.72 | 0.64    |
| >16                             | 0.92    | 0.45                    | 1.91 | 0.83    |
| Income level                    |         |                         |      |         |
| Negative or poor (reference)    | 1       |                         |      |         |
| Near poor                       | 1.04    | 0.79                    | 1.37 | 0.78    |
| Low income                      | 0.84    | 0.69                    | 1.03 | 0.088   |
| Middle income                   | 0.91    | 0.72                    | 1.15 | 0.44    |
| High income                     | 0.71**  | 0.56                    | 0.90 | 0.004   |
| Unemployed                      | 0.26*** | 0.18                    | 0.35 | <0.001  |
| Health insurance                |         |                         |      |         |
| Medicare                        | 1.18    | 0.65                    | 2.14 | 0.58    |
| Medicaid                        | 1.37**  | 1.10                    | 1.70 | 0.005   |
| Private HMO                     | 1.37*** | 1.19                    | 1.57 | <0.001  |
| Other private plan              | 1.10    | 0.95                    | 1.27 | 0.20    |
| Currently smoke                 | 1.24**  | 1.10                    | 1.40 | 0.001   |
| Number of CS categories         | 2.14*** | 2.02                    | 2.28 | <0.001  |
| Nephropathy                     | 1.11    | 0.66                    | 1.87 | 0.68    |
| Retinopathy                     | 0.85    | 0.59                    | 1.22 | 0.37    |
| Neuropathy                      | 0.61    | 0.10                    | 3.64 | 0.59    |

Note: IRR: incidence-rate ratio, for which larger than 1 indicates higher number of days.

\* p<0.05; \*\* p<0.01; \*\*\* p<0.001

Appendix 6. Negative binomial model on additional bed days for all patients (n=46,617)

| Variable                        | IRR     | 95% Confidence Interval |       | P-value |
|---------------------------------|---------|-------------------------|-------|---------|
| Diabetes                        | 1.48*   | 1.06                    | 2.06  | 0.020   |
| MVCC                            | 1.48**  | 1.16                    | 1.89  | 0.002   |
| Diabetes × MVCC                 | 0.81    | 0.49                    | 1.35  | 0.43    |
| No diabetes or MVCC (reference) | 1       |                         |       |         |
| Age groups (years)              |         |                         |       |         |
| 18-24 (reference)               | 1       |                         |       |         |
| 25-34                           | 1.51*** | 1.23                    | 1.84  | <0.001  |
| 35-44                           | 1.59*** | 1.27                    | 1.99  | <0.001  |
| 45-54                           | 1.67*** | 1.35                    | 2.07  | <0.001  |
| 55-64                           | 1.27    | 0.99                    | 1.63  | 0.065   |
| 65+                             | 0.86    | 0.57                    | 1.28  | 0.45    |
| Gender                          |         |                         |       |         |
| Female                          | 1.33*** | 1.18                    | 1.50  | <0.001  |
| Race                            |         |                         |       |         |
| White (reference)               | 1       |                         |       |         |
| Black                           | 1.10    | 0.88                    | 1.36  | 0.40    |
| Asian                           | 0.62**  | 0.45                    | 0.86  | 0.004   |
| Other race                      | 1.99*** | 1.40                    | 2.84  | <0.001  |
| Hispanic ethnicity              | 0.68*** | 0.55                    | 0.83  | <0.001  |
| Years of Education              |         |                         |       |         |
| 0 (reference)                   | 1       |                         |       |         |
| 1-8                             | 0.74    | 0.29                    | 1.89  | 0.52    |
| 9-11                            | 1.00    | 0.39                    | 2.56  | 1.00    |
| 12                              | 0.87    | 0.34                    | 2.23  | 0.77    |
| 13-16                           | 0.88    | 0.34                    | 2.30  | 0.80    |
| >16                             | 0.93    | 0.34                    | 2.54  | 0.89    |
| Income level                    |         |                         |       |         |
| Negative or poor (reference)    | 1       |                         |       |         |
| Near poor                       | 0.92    | 0.70                    | 1.20  | 0.52    |
| Low income                      | 0.76**  | 0.63                    | 0.93  | 0.007   |
| Middle income                   | 0.61*** | 0.49                    | 0.76  | <0.001  |
| High income                     | 0.53*** | 0.42                    | 0.66  | <0.001  |
| Unemployed                      | 2.29*** | 1.95                    | 2.68  | <0.001  |
| Health insurance                |         |                         |       |         |
| Medicare                        | 2.59*** | 1.91                    | 3.51  | <0.001  |
| Medicaid                        | 1.57*** | 1.30                    | 1.90  | <0.001  |
| Private HMO                     | 0.80*   | 0.67                    | 0.96  | 0.016   |
| Other private plan              | 0.64*** | 0.53                    | 0.76  | <0.001  |
| Currently smoke                 | 1.57*** | 1.34                    | 1.83  | <0.001  |
| Number of CS categories         | 2.21*** | 2.06                    | 2.37  | <0.001  |
| Nephropathy                     | 1.34    | 0.84                    | 2.13  | 0.22    |
| Retinopathy                     | 0.91    | 0.66                    | 1.24  | 0.55    |
| Neuropathy                      | 6.69*** | 2.82                    | 15.89 | <0.001  |

Note: IRR: incidence-rate ratio, for which larger than 1 indicates higher number of days.

\* p<0.05; \*\* p<0.01; \*\*\* p<0.001
